# Supplementary material
Source: publisher figshare collection journal article supplement (https://acs.figshare.com/ndownloader/files/4581904)
Supplement: Supplementary file 1 [file 4581904]

  
data_rlm5 
  
_audit_creation_method            SHELXL-97 
_chemical_name_systematic 
; 
 ? 
; 
_chemical_name_common             ? 
_chemical_melting_point           ? 
_chemical_formula_moiety          ? 
_chemical_formula_sum 
 'C18 H21 N7 O3' 
_chemical_formula_weight          383.42 
  
loop_ 
 _atom_type_symbol 
 _atom_type_description 
 _atom_type_scat_dispersion_real 
 _atom_type_scat_dispersion_imag 
 _atom_type_scat_source 
 'C'  'C'   0.0033   0.0016 
 'International Tables Vol C Tables 4.2.6.8 and 6.1.1.4' 
 'H'  'H'   0.0000   0.0000 
 'International Tables Vol C Tables 4.2.6.8 and 6.1.1.4' 
 'N'  'N'   0.0061   0.0033 
 'International Tables Vol C Tables 4.2.6.8 and 6.1.1.4' 
 'O'  'O'   0.0106   0.0060 
 'International Tables Vol C Tables 4.2.6.8 and 6.1.1.4' 
  
_symmetry_cell_setting            Monoclinic 
_symmetry_space_group_name_H-M    P21/n 
  
loop_ 
 _symmetry_equiv_pos_as_xyz 
 'x, y, z' 
 '-x+1/2, y+1/2, -z+1/2' 
 '-x, -y, -z' 
 'x-1/2, -y-1/2, z-1/2' 
  
_cell_length_a                    10.6415(8) 
_cell_length_b                    13.5541(10) 
_cell_length_c                    13.0430(9) 
_cell_angle_alpha                 90.00 
_cell_angle_beta                  107.01(1) 
_cell_angle_gamma                 90.00 
_cell_volume                      1799.0(2) 
_cell_formula_units_Z             4 
_cell_measurement_temperature     173(2) 
_cell_measurement_reflns_used     106 
_cell_measurement_theta_min       2.0 
_cell_measurement_theta_max       28.0 
  
_exptl_crystal_description        needles 
_exptl_crystal_colour             colorless 
_exptl_crystal_size_max           0.32 
_exptl_crystal_size_mid           0.08 
_exptl_crystal_size_min           0.06 
_exptl_crystal_density_meas       ? 
_exptl_crystal_density_diffrn     1.416 
_exptl_crystal_density_method     'not measured' 
_exptl_crystal_F_000              808 
_exptl_absorpt_coefficient_mu     0.101 
_exptl_absorpt_correction_type    integration 
_exptl_absorpt_correction_T_min   0.9756 
_exptl_absorpt_correction_T_max   0.9941 
_exptl_absorpt_process_details 
'based on measured indexed crystal faces, Bruker SHELXTL  v6.12 (Bruker 1998)' 
  
_exptl_special_details 
; 
 ? 
; 
  
_diffrn_ambient_temperature       173(2) 
_diffrn_radiation_wavelength      0.71073 
_diffrn_radiation_type            MoK\a 
_diffrn_radiation_source          'fine-focus sealed tube' 
_diffrn_radiation_monochromator   graphite 
_diffrn_measurement_device_type   'SMART CCD area detector' 
_diffrn_measurement_method        '\w scans' 
_diffrn_detector_area_resol_mean  ? 
_diffrn_standards_number          0 
_diffrn_standards_interval_count  ? 
_diffrn_standards_interval_time   ? 
_diffrn_standards_decay_%         1 
_diffrn_reflns_number             12006 
_diffrn_reflns_av_R_equivalents   0.0418 
_diffrn_reflns_av_sigmaI/netI     0.0320 
_diffrn_reflns_limit_h_min        -13 
_diffrn_reflns_limit_h_max        13 
_diffrn_reflns_limit_k_min        -15 
_diffrn_reflns_limit_k_max        17 
_diffrn_reflns_limit_l_min        -16 
_diffrn_reflns_limit_l_max        16 
_diffrn_reflns_theta_min          2.18 
_diffrn_reflns_theta_max          27.49 
_reflns_number_total              4125 
_reflns_number_gt                 3472 
_reflns_threshold_expression      'I>2\s(I)' 
  
_computing_data_collection        'Bruker SMART v5.624 (Bruker 1998)' 
_computing_cell_refinement  'Bruker SMART v5.624 & SAINT 6.36a (Bruker 1998)' 
_computing_data_reduction         'Bruker SHELXTL v6.14 (Bruker 2000)' 
_computing_structure_solution     'Bruker SHELXTL v6.14' 
_computing_structure_refinement   'Bruker SHELXTL v6.14' 
_computing_molecular_graphics     'Bruker SHELXTL v6.14' 
_computing_publication_material   'Bruker SHELXTL v6.14' 
  
_refine_special_details 
; 
 Refinement of F^2^ against ALL reflections.  The weighted R-factor wR and 
 goodness of fit S are based on F^2^, conventional R-factors R are based 
 on F, with F set to zero for negative F^2^. The threshold expression of 
 F^2^ > 2sigma(F^2^) is used only for calculating R-factors(gt) etc. and is 
 not relevant to the choice of reflections for refinement.  R-factors based 
 on F^2^ are statistically about twice as large as those based on F, and R- 
 factors based on ALL data will be even larger. 

The NH2 protons were obtained from a Difference Fourier map and refined without
 any constraints. 
; 
  
_refine_ls_structure_factor_coef  Fsqd 
_refine_ls_matrix_type            full 
_refine_ls_weighting_scheme       calc 
_refine_ls_weighting_details 
 'calc w=1/[\s^2^(Fo^2^)+(0.0564P)^2^+0.5168P] where P=(Fo^2^+2Fc^2^)/3' 
_atom_sites_solution_primary      direct 
_atom_sites_solution_secondary    difmap 
_atom_sites_solution_hydrogens    geom 
_refine_ls_hydrogen_treatment     mixed 
_refine_ls_extinction_method      none 
_refine_ls_extinction_coef        ? 
_refine_ls_number_reflns          4125 
_refine_ls_number_parameters      268 
_refine_ls_number_restraints      0 
_refine_ls_R_factor_all           0.0545 
_refine_ls_R_factor_gt            0.0442 
_refine_ls_wR_factor_ref          0.1162 
_refine_ls_wR_factor_gt           0.1101 
_refine_ls_goodness_of_fit_ref    1.064 
_refine_ls_restrained_S_all       1.064 
_refine_ls_shift/su_max           0.000 
_refine_ls_shift/su_mean          0.000 
  
loop_ 
 _atom_site_label 
 _atom_site_type_symbol 
 _atom_site_fract_x 
 _atom_site_fract_y 
 _atom_site_fract_z 
 _atom_site_U_iso_or_equiv 
 _atom_site_adp_type 
 _atom_site_occupancy 
 _atom_site_symmetry_multiplicity 
 _atom_site_calc_flag 
 _atom_site_refinement_flags 
 _atom_site_disorder_assembly 
 _atom_site_disorder_group 
N1 N -0.04164(11) -0.04469(9) 0.79587(9) 0.0259(3) Uani 1 1 d . . . 
N3 N 0.07428(11) 0.01351(9) 0.67166(9) 0.0246(3) Uani 1 1 d . . . 
N7 N 0.08414(11) -0.24988(9) 0.66615(9) 0.0252(3) Uani 1 1 d . . . 
N9 N 0.15611(11) -0.12180(9) 0.58770(9) 0.0230(3) Uani 1 1 d . . . 
N10 N -0.07312(14) -0.20935(11) 0.82517(11) 0.0340(3) Uani 1 1 d . . . 
H10A H -0.0596(17) -0.2715(15) 0.8100(14) 0.037(5) Uiso 1 1 d . . . 
H10B H -0.1188(17) -0.1930(14) 0.8686(15) 0.041(5) Uiso 1 1 d . . . 
N11 N -0.01725(13) 0.12115(10) 0.76645(11) 0.0322(3) Uani 1 1 d . . . 
N16 N 0.19006(13) -0.38970(10) 0.56426(10) 0.0298(3) Uani 1 1 d . . . 
H16 H 0.148(2) -0.4059(16) 0.6081(16) 0.053(6) Uiso 1 1 d . . . 
O15 O 0.26387(10) -0.27202(8) 0.47416(8) 0.0330(3) Uani 1 1 d . . . 
O19 O 0.12946(15) -0.57742(10) 0.60640(11) 0.0536(4) Uani 1 1 d . . . 
O20 O 0.24876(12) -0.64032(8) 0.50649(9) 0.0381(3) Uani 1 1 d . . . 
C2 C 0.00639(12) 0.02676(11) 0.74343(11) 0.0241(3) Uani 1 1 d . . . 
C4 C 0.09107(12) -0.08213(11) 0.65520(10) 0.0228(3) Uani 1 1 d . . . 
C5 C 0.04739(13) -0.16206(10) 0.70176(11) 0.0239(3) Uani 1 1 d . . . 
C6 C -0.02342(13) -0.13885(11) 0.77565(11) 0.0248(3) Uani 1 1 d . . . 
C8 C 0.14927(12) -0.22294(11) 0.59857(10) 0.0234(3) Uani 1 1 d . . . 
C12 C -0.08118(15) 0.14642(12) 0.84724(13) 0.0335(3) Uani 1 1 d . . . 
H12A H -0.1012 0.0860 0.8806 0.050 Uiso 1 1 calc R . . 
H12B H -0.1629 0.1822 0.8135 0.050 Uiso 1 1 calc R . . 
H12C H -0.0226 0.1882 0.9021 0.050 Uiso 1 1 calc R . . 
C13 C 0.02817(16) 0.20276(12) 0.71437(13) 0.0352(4) Uani 1 1 d . . . 
H13A H 0.0024 0.1915 0.6368 0.053 Uiso 1 1 calc R . . 
H13B H 0.1241 0.2075 0.7417 0.053 Uiso 1 1 calc R . . 
H13C H -0.0114 0.2643 0.7294 0.053 Uiso 1 1 calc R . . 
C14 C 0.20641(13) -0.29607(11) 0.53973(10) 0.0241(3) Uani 1 1 d . . . 
C17 C 0.23521(16) -0.46967(11) 0.51120(12) 0.0310(3) Uani 1 1 d . . . 
H17A H 0.3320 -0.4664 0.5274 0.037 Uiso 1 1 calc R . . 
H17B H 0.1963 -0.4635 0.4326 0.037 Uiso 1 1 calc R . . 
C18 C 0.19667(14) -0.56693(11) 0.54810(11) 0.0294(3) Uani 1 1 d . . . 
C21 C 0.22389(18) -0.73873(12) 0.53785(14) 0.0392(4) Uani 1 1 d . . . 
H21A H 0.2761 -0.7861 0.5108 0.059 Uiso 1 1 calc R . . 
H21B H 0.1303 -0.7542 0.5078 0.059 Uiso 1 1 calc R . . 
H21C H 0.2483 -0.7428 0.6162 0.059 Uiso 1 1 calc R . . 
C22 C 0.22566(13) -0.06219(11) 0.52705(10) 0.0240(3) Uani 1 1 d . . . 
H22A H 0.1799 0.0018 0.5078 0.029 Uiso 1 1 calc R . . 
H22B H 0.2232 -0.0969 0.4597 0.029 Uiso 1 1 calc R . . 
C23 C 0.36717(13) -0.04361(10) 0.59072(10) 0.0225(3) Uani 1 1 d . . . 
C24 C 0.46874(14) -0.09662(11) 0.56995(11) 0.0268(3) Uani 1 1 d . . . 
H24A H 0.4496 -0.1446 0.5144 0.032 Uiso 1 1 calc R . . 
C25 C 0.59813(14) -0.07986(11) 0.63004(12) 0.0301(3) Uani 1 1 d . . . 
H25A H 0.6670 -0.1165 0.6154 0.036 Uiso 1 1 calc R . . 
C26 C 0.62719(14) -0.01039(11) 0.71083(12) 0.0293(3) Uani 1 1 d . . . 
H26A H 0.7158 0.0008 0.7517 0.035 Uiso 1 1 calc R . . 
C27 C 0.52639(14) 0.04315(11) 0.73218(11) 0.0288(3) Uani 1 1 d . . . 
H27A H 0.5460 0.0909 0.7879 0.035 Uiso 1 1 calc R . . 
C28 C 0.39712(14) 0.02683(11) 0.67213(11) 0.0263(3) Uani 1 1 d . . . 
H28A H 0.3285 0.0639 0.6866 0.032 Uiso 1 1 calc R . . 
  
loop_ 
 _atom_site_aniso_label 
 _atom_site_aniso_U_11 
 _atom_site_aniso_U_22 
 _atom_site_aniso_U_33 
 _atom_site_aniso_U_23 
 _atom_site_aniso_U_13 
 _atom_site_aniso_U_12 
N1 0.0229(6) 0.0306(6) 0.0279(6) -0.0010(5) 0.0131(5) -0.0003(5) 
N3 0.0222(6) 0.0283(6) 0.0257(6) 0.0010(5) 0.0107(5) 0.0017(5) 
N7 0.0233(6) 0.0302(6) 0.0248(6) -0.0007(5) 0.0112(5) 0.0003(5) 
N9 0.0201(5) 0.0291(6) 0.0220(5) 0.0011(4) 0.0097(4) 0.0014(4) 
N10 0.0418(8) 0.0300(7) 0.0422(8) -0.0017(6) 0.0310(6) -0.0011(6) 
N11 0.0347(7) 0.0291(7) 0.0397(7) -0.0021(5) 0.0219(6) 0.0004(5) 
N16 0.0355(7) 0.0307(7) 0.0288(6) -0.0030(5) 0.0184(5) -0.0004(5) 
O15 0.0369(6) 0.0359(6) 0.0341(6) -0.0011(5) 0.0227(5) 0.0008(5) 
O19 0.0772(9) 0.0385(7) 0.0666(9) -0.0037(6) 0.0544(8) -0.0027(6) 
O20 0.0507(7) 0.0296(6) 0.0444(6) -0.0042(5) 0.0301(5) -0.0015(5) 
C2 0.0180(6) 0.0308(8) 0.0244(6) 0.0000(5) 0.0073(5) 0.0005(5) 
C4 0.0171(6) 0.0310(7) 0.0212(6) 0.0008(5) 0.0069(5) 0.0009(5) 
C5 0.0205(6) 0.0280(7) 0.0250(6) -0.0004(5) 0.0094(5) 0.0004(5) 
C6 0.0203(6) 0.0318(8) 0.0245(6) -0.0004(6) 0.0099(5) -0.0013(5) 
C8 0.0202(6) 0.0293(7) 0.0216(6) 0.0000(5) 0.0073(5) 0.0004(5) 
C12 0.0321(8) 0.0335(8) 0.0402(8) -0.0094(7) 0.0188(7) -0.0023(6) 
C13 0.0398(8) 0.0305(8) 0.0386(8) 0.0009(6) 0.0164(7) -0.0003(7) 
C14 0.0193(6) 0.0322(8) 0.0210(6) -0.0024(5) 0.0059(5) 0.0000(5) 
C17 0.0368(8) 0.0318(8) 0.0295(7) -0.0044(6) 0.0175(6) -0.0004(6) 
C18 0.0307(7) 0.0343(8) 0.0251(7) -0.0050(6) 0.0113(6) -0.0015(6) 
C21 0.0491(10) 0.0295(8) 0.0443(9) -0.0039(7) 0.0218(8) -0.0036(7) 
C22 0.0234(6) 0.0294(7) 0.0218(6) 0.0046(5) 0.0109(5) 0.0009(5) 
C23 0.0244(6) 0.0241(7) 0.0224(6) 0.0060(5) 0.0122(5) 0.0000(5) 
C24 0.0297(7) 0.0266(7) 0.0274(7) -0.0009(6) 0.0136(6) 0.0006(6) 
C25 0.0259(7) 0.0316(8) 0.0373(8) 0.0038(6) 0.0164(6) 0.0060(6) 
C26 0.0233(7) 0.0349(8) 0.0300(7) 0.0042(6) 0.0082(6) -0.0010(6) 
C27 0.0312(7) 0.0301(8) 0.0267(7) -0.0019(6) 0.0111(6) -0.0014(6) 
C28 0.0262(7) 0.0286(7) 0.0281(7) 0.0028(6) 0.0140(6) 0.0038(6) 
  
_geom_special_details 
; 
 All esds (except the esd in the dihedral angle between two l.s. planes) 
 are estimated using the full covariance matrix.  The cell esds are taken 
 into account individually in the estimation of esds in distances, angles 
 and torsion angles; correlations between esds in cell parameters are only 
 used when they are defined by crystal symmetry.  An approximate (isotropic) 
 treatment of cell esds is used for estimating esds involving l.s. planes. 
; 
  
loop_ 
 _geom_bond_atom_site_label_1 
 _geom_bond_atom_site_label_2 
 _geom_bond_distance 
 _geom_bond_site_symmetry_2 
 _geom_bond_publ_flag 
N1 C6 1.3289(19) . ? 
N1 C2 1.3680(18) . ? 
N3 C4 1.3345(18) . ? 
N3 C2 1.3513(17) . ? 
N7 C8 1.3222(17) . ? 
N7 C5 1.3754(18) . ? 
N9 C4 1.3784(16) . ? 
N9 C8 1.3822(19) . ? 
N9 C22 1.4727(16) . ? 
N10 C6 1.3454(19) . ? 
N10 H10A 0.886(19) . ? 
N10 H10B 0.876(19) . ? 
N11 C2 1.3545(19) . ? 
N11 C12 1.4525(18) . ? 
N11 C13 1.453(2) . ? 
N16 C14 1.333(2) . ? 
N16 C17 1.4419(19) . ? 
N16 H16 0.85(2) . ? 
O15 C14 1.2320(16) . ? 
O19 C18 1.1950(18) . ? 
O20 C18 1.3294(18) . ? 
O20 C21 1.4422(19) . ? 
C4 C5 1.3870(19) . ? 
C5 C6 1.4215(18) . ? 
C8 C14 1.4879(19) . ? 
C12 H12A 0.9800 . ? 
C12 H12B 0.9800 . ? 
C12 H12C 0.9800 . ? 
C13 H13A 0.9800 . ? 
C13 H13B 0.9800 . ? 
C13 H13C 0.9800 . ? 
C17 C18 1.501(2) . ? 
C17 H17A 0.9900 . ? 
C17 H17B 0.9900 . ? 
C21 H21A 0.9800 . ? 
C21 H21B 0.9800 . ? 
C21 H21C 0.9800 . ? 
C22 C23 1.5130(19) . ? 
C22 H22A 0.9900 . ? 
C22 H22B 0.9900 . ? 
C23 C24 1.3889(19) . ? 
C23 C28 1.394(2) . ? 
C24 C25 1.389(2) . ? 
C24 H24A 0.9500 . ? 
C25 C26 1.379(2) . ? 
C25 H25A 0.9500 . ? 
C26 C27 1.389(2) . ? 
C26 H26A 0.9500 . ? 
C27 C28 1.387(2) . ? 
C27 H27A 0.9500 . ? 
C28 H28A 0.9500 . ? 
  
loop_ 
 _geom_angle_atom_site_label_1 
 _geom_angle_atom_site_label_2 
 _geom_angle_atom_site_label_3 
 _geom_angle 
 _geom_angle_site_symmetry_1 
 _geom_angle_site_symmetry_3 
 _geom_angle_publ_flag 
C6 N1 C2 118.89(11) . . ? 
C4 N3 C2 111.37(12) . . ? 
C8 N7 C5 104.03(12) . . ? 
C4 N9 C8 105.67(11) . . ? 
C4 N9 C22 123.65(12) . . ? 
C8 N9 C22 130.47(11) . . ? 
C6 N10 H10A 117.1(12) . . ? 
C6 N10 H10B 120.1(13) . . ? 
H10A N10 H10B 122.8(17) . . ? 
C2 N11 C12 122.70(13) . . ? 
C2 N11 C13 120.45(12) . . ? 
C12 N11 C13 116.75(13) . . ? 
C14 N16 C17 121.03(12) . . ? 
C14 N16 H16 122.5(15) . . ? 
C17 N16 H16 116.3(15) . . ? 
C18 O20 C21 116.32(12) . . ? 
N3 C2 N11 116.79(12) . . ? 
N3 C2 N1 127.30(13) . . ? 
N11 C2 N1 115.92(12) . . ? 
N3 C4 N9 126.70(12) . . ? 
N3 C4 C5 127.63(12) . . ? 
N9 C4 C5 105.67(12) . . ? 
N7 C5 C4 111.31(11) . . ? 
N7 C5 C6 132.84(13) . . ? 
C4 C5 C6 115.85(13) . . ? 
N1 C6 N10 119.09(12) . . ? 
N1 C6 C5 118.96(13) . . ? 
N10 C6 C5 121.95(14) . . ? 
N7 C8 N9 113.32(12) . . ? 
N7 C8 C14 122.20(13) . . ? 
N9 C8 C14 124.47(12) . . ? 
N11 C12 H12A 109.5 . . ? 
N11 C12 H12B 109.5 . . ? 
H12A C12 H12B 109.5 . . ? 
N11 C12 H12C 109.5 . . ? 
H12A C12 H12C 109.5 . . ? 
H12B C12 H12C 109.5 . . ? 
N11 C13 H13A 109.5 . . ? 
N11 C13 H13B 109.5 . . ? 
H13A C13 H13B 109.5 . . ? 
N11 C13 H13C 109.5 . . ? 
H13A C13 H13C 109.5 . . ? 
H13B C13 H13C 109.5 . . ? 
O15 C14 N16 123.01(13) . . ? 
O15 C14 C8 122.86(13) . . ? 
N16 C14 C8 114.14(12) . . ? 
N16 C17 C18 110.22(12) . . ? 
N16 C17 H17A 109.6 . . ? 
C18 C17 H17A 109.6 . . ? 
N16 C17 H17B 109.6 . . ? 
C18 C17 H17B 109.6 . . ? 
H17A C17 H17B 108.1 . . ? 
O19 C18 O20 124.70(15) . . ? 
O19 C18 C17 125.38(14) . . ? 
O20 C18 C17 109.92(12) . . ? 
O20 C21 H21A 109.5 . . ? 
O20 C21 H21B 109.5 . . ? 
H21A C21 H21B 109.5 . . ? 
O20 C21 H21C 109.5 . . ? 
H21A C21 H21C 109.5 . . ? 
H21B C21 H21C 109.5 . . ? 
N9 C22 C23 111.86(10) . . ? 
N9 C22 H22A 109.2 . . ? 
C23 C22 H22A 109.2 . . ? 
N9 C22 H22B 109.2 . . ? 
C23 C22 H22B 109.2 . . ? 
H22A C22 H22B 107.9 . . ? 
C24 C23 C28 119.04(13) . . ? 
C24 C23 C22 120.87(12) . . ? 
C28 C23 C22 120.08(12) . . ? 
C23 C24 C25 120.31(13) . . ? 
C23 C24 H24A 119.8 . . ? 
C25 C24 H24A 119.8 . . ? 
C26 C25 C24 120.42(13) . . ? 
C26 C25 H25A 119.8 . . ? 
C24 C25 H25A 119.8 . . ? 
C25 C26 C27 119.74(13) . . ? 
C25 C26 H26A 120.1 . . ? 
C27 C26 H26A 120.1 . . ? 
C28 C27 C26 119.99(14) . . ? 
C28 C27 H27A 120.0 . . ? 
C26 C27 H27A 120.0 . . ? 
C27 C28 C23 120.49(13) . . ? 
C27 C28 H28A 119.8 . . ? 
C23 C28 H28A 119.8 . . ? 
  
loop_ 
 _geom_torsion_atom_site_label_1 
 _geom_torsion_atom_site_label_2 
 _geom_torsion_atom_site_label_3 
 _geom_torsion_atom_site_label_4 
 _geom_torsion 
 _geom_torsion_site_symmetry_1 
 _geom_torsion_site_symmetry_2 
 _geom_torsion_site_symmetry_3 
 _geom_torsion_site_symmetry_4 
 _geom_torsion_publ_flag 
C4 N3 C2 N11 -179.77(12) . . . . ? 
C4 N3 C2 N1 0.19(19) . . . . ? 
C12 N11 C2 N3 -175.75(13) . . . . ? 
C13 N11 C2 N3 0.6(2) . . . . ? 
C12 N11 C2 N1 4.3(2) . . . . ? 
C13 N11 C2 N1 -179.33(12) . . . . ? 
C6 N1 C2 N3 -0.9(2) . . . . ? 
C6 N1 C2 N11 179.02(12) . . . . ? 
C2 N3 C4 N9 -179.69(12) . . . . ? 
C2 N3 C4 C5 0.30(19) . . . . ? 
C8 N9 C4 N3 179.25(13) . . . . ? 
C22 N9 C4 N3 4.0(2) . . . . ? 
C8 N9 C4 C5 -0.75(14) . . . . ? 
C22 N9 C4 C5 -175.97(11) . . . . ? 
C8 N7 C5 C4 -0.09(15) . . . . ? 
C8 N7 C5 C6 -179.36(15) . . . . ? 
N3 C4 C5 N7 -179.45(12) . . . . ? 
N9 C4 C5 N7 0.54(15) . . . . ? 
N3 C4 C5 C6 0.0(2) . . . . ? 
N9 C4 C5 C6 179.95(11) . . . . ? 
C2 N1 C6 N10 -178.48(13) . . . . ? 
C2 N1 C6 C5 1.15(19) . . . . ? 
N7 C5 C6 N1 178.54(14) . . . . ? 
C4 C5 C6 N1 -0.71(19) . . . . ? 
N7 C5 C6 N10 -1.8(2) . . . . ? 
C4 C5 C6 N10 178.90(13) . . . . ? 
C5 N7 C8 N9 -0.42(15) . . . . ? 
C5 N7 C8 C14 -179.40(12) . . . . ? 
C4 N9 C8 N7 0.76(15) . . . . ? 
C22 N9 C8 N7 175.54(12) . . . . ? 
C4 N9 C8 C14 179.72(12) . . . . ? 
C22 N9 C8 C14 -5.5(2) . . . . ? 
C17 N16 C14 O15 -2.5(2) . . . . ? 
C17 N16 C14 C8 177.57(12) . . . . ? 
N7 C8 C14 O15 177.76(13) . . . . ? 
N9 C8 C14 O15 -1.1(2) . . . . ? 
N7 C8 C14 N16 -2.30(19) . . . . ? 
N9 C8 C14 N16 178.84(12) . . . . ? 
C14 N16 C17 C18 -176.16(13) . . . . ? 
C21 O20 C18 O19 -1.9(2) . . . . ? 
C21 O20 C18 C17 177.95(13) . . . . ? 
N16 C17 C18 O19 5.5(2) . . . . ? 
N16 C17 C18 O20 -174.33(12) . . . . ? 
C4 N9 C22 C23 88.75(15) . . . . ? 
C8 N9 C22 C23 -85.20(17) . . . . ? 
N9 C22 C23 C24 102.46(14) . . . . ? 
N9 C22 C23 C28 -76.96(16) . . . . ? 
C28 C23 C24 C25 0.4(2) . . . . ? 
C22 C23 C24 C25 -179.06(12) . . . . ? 
C23 C24 C25 C26 -0.1(2) . . . . ? 
C24 C25 C26 C27 0.0(2) . . . . ? 
C25 C26 C27 C28 -0.2(2) . . . . ? 
C26 C27 C28 C23 0.5(2) . . . . ? 
C24 C23 C28 C27 -0.6(2) . . . . ? 
C22 C23 C28 C27 178.86(12) . . . . ? 
  
loop_ 
 _geom_hbond_atom_site_label_D 
 _geom_hbond_atom_site_label_H 
 _geom_hbond_atom_site_label_A 
 _geom_hbond_distance_DH 
 _geom_hbond_distance_HA 
 _geom_hbond_distance_DA 
 _geom_hbond_angle_DHA 
 _geom_hbond_site_symmetry_A 
N10 H10B O15  0.876(19) 2.164(19) 2.9700(16) 152.6(17) 4_556 
  
_diffrn_measured_fraction_theta_max    0.997 
_diffrn_reflns_theta_full              27.49 
_diffrn_measured_fraction_theta_full   0.997 
_refine_diff_density_max    0.304 
_refine_diff_density_min   -0.206 
_refine_diff_density_rms    0.042 

# Formatted by publCIF
